# Supplementary material
Source: publisher figshare collection journal article supplement (https://karger.figshare.com/ndownloader/files/13346927)
Supplement: Supplementary file 1 [file 13346927]

# **Supplementary Material**

## **Long Non-Coding RNA Expression Profiles For the Characterization of Different Bladder Cancer Grade**

Yue-Peng Cao<sup>a</sup> Jun Zhou<sup>a</sup> Wei-Jian Li<sup>a</sup> Yang Shao<sup>b</sup> Kai-peng Xie<sup>b,c</sup>  
Xiang Yan<sup>a</sup>

<sup>a</sup>Department of Urology, Drum Tower Hospital, Medical School of Nanjing University, Institute of Urology, Nanjing University, Nanjing, <sup>b</sup>Nanjing Maternity and Child Health Care Institute, The Affiliated Obstetrics and Gynaecology Hospital of Nanjing Medical University, Nanjing Maternity and Child Health Care Hospital, Nanjing, China, <sup>c</sup>Department of Women Health Care, The Affiliated Obstetrics and Gynaecology Hospital of Nanjing Medical University, Nanjing Maternity and Child Health Care Hospital, Nanjing, China

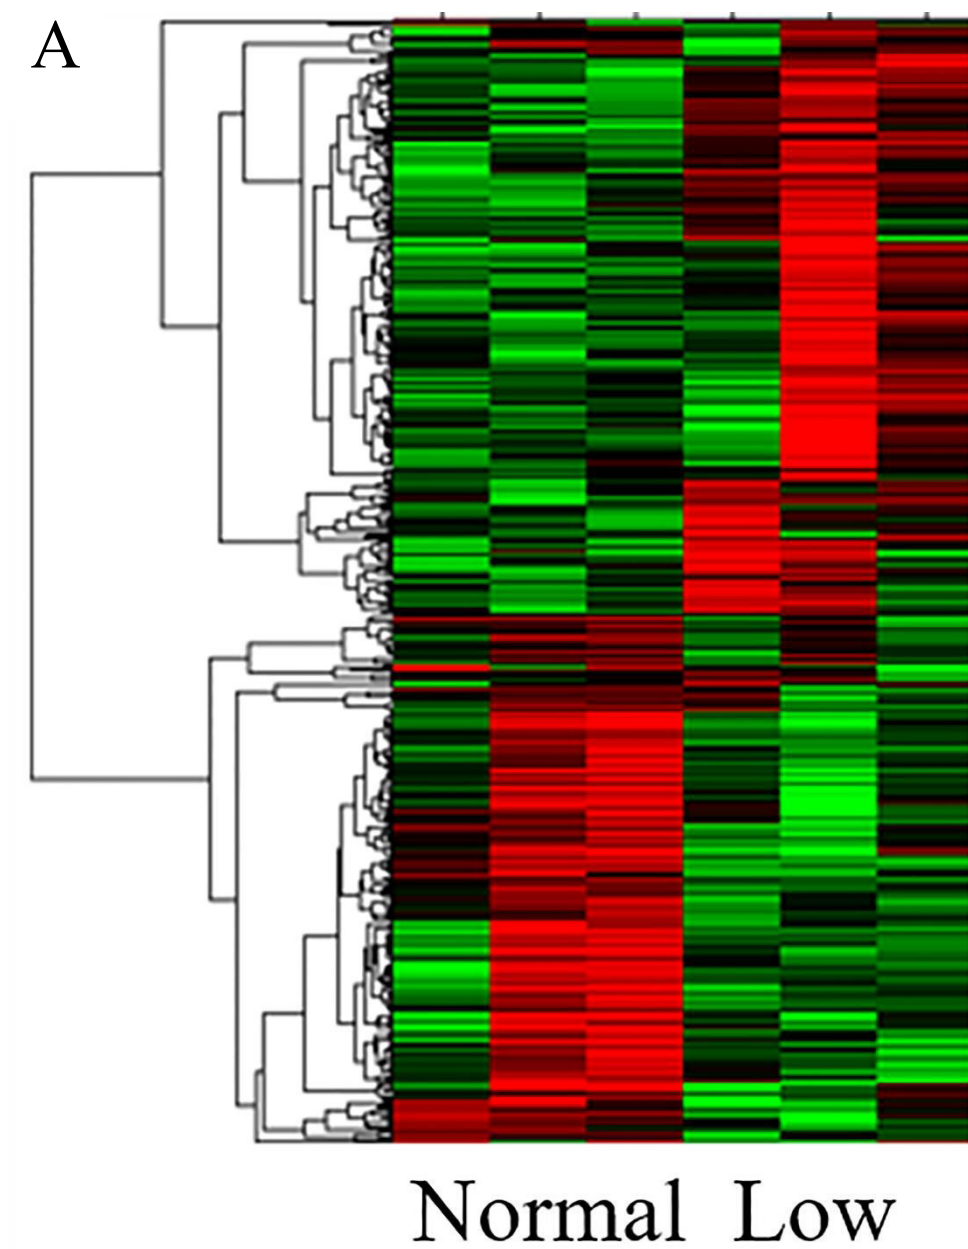

**Fig.S1. Differentially expressed lncRNAs in low grade bladder cancer and normal urothelium tissues**

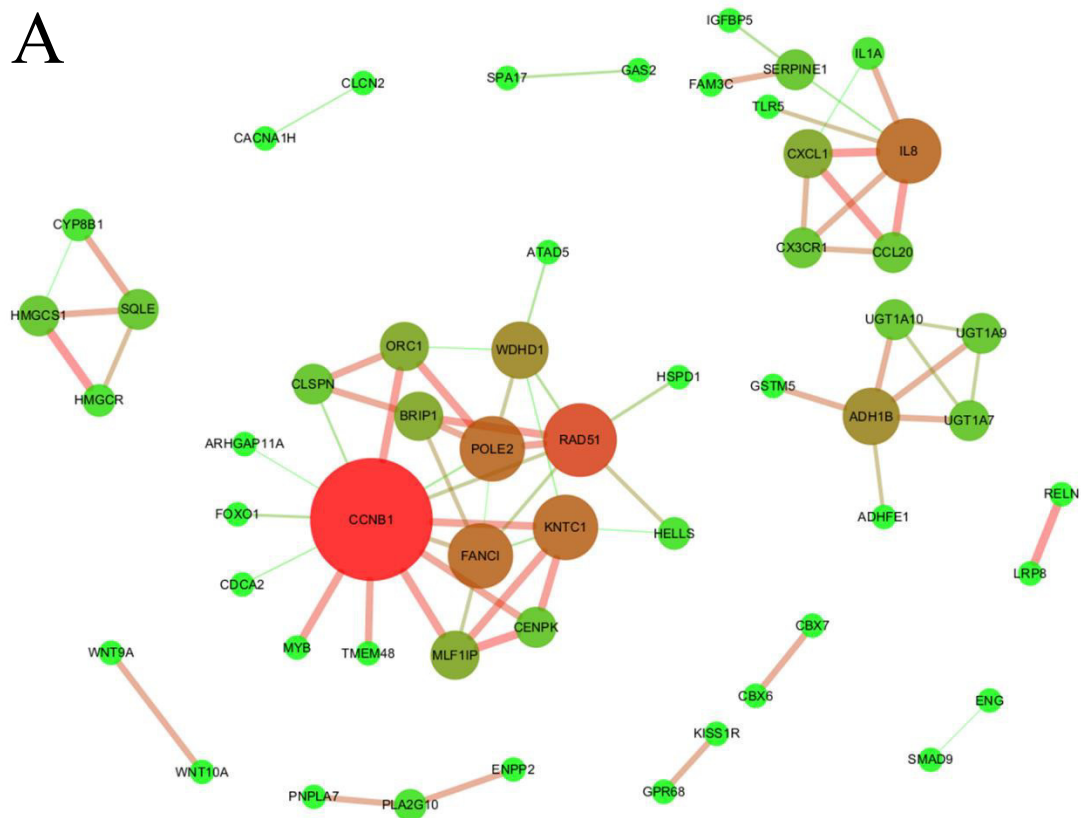

**Fig.S3. lncRNA-mRNA co-expression based on the correlation analysis.**

A

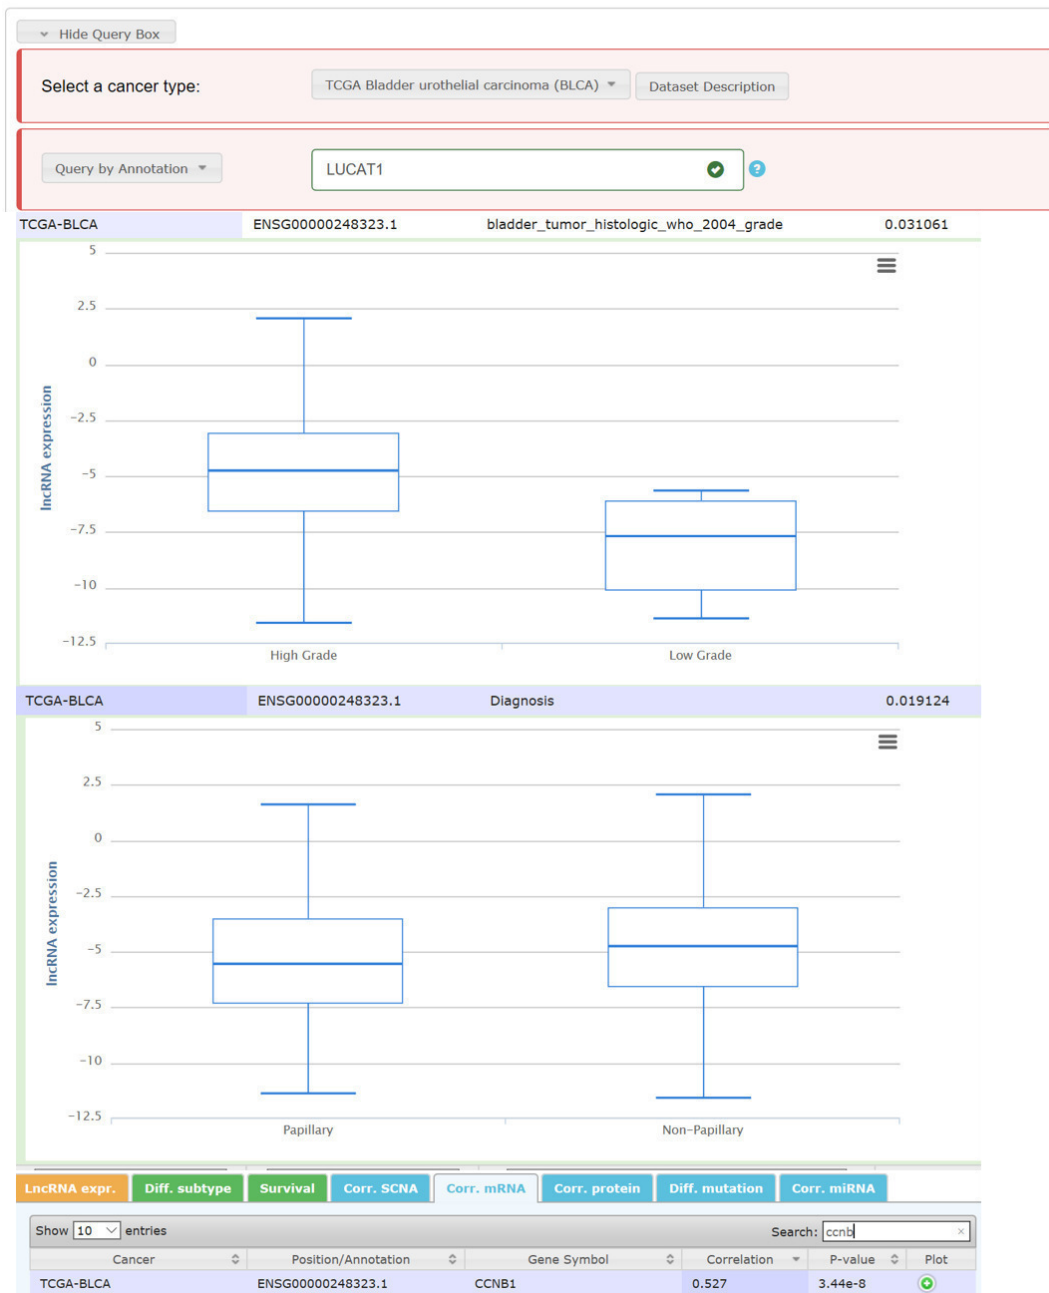

**Fig.S4. The Statistics about LUCAT1 and CCNB1 from TCGA database.**
